# Supplementary figures and images for: Logical-continuous modelling of post-translationally regulated bistability of curli fiber expression in Escherichia coli
Source: Springer Nature journal article supplement (doi:10.1186/s12918-015-0183-x), 2015-07-22

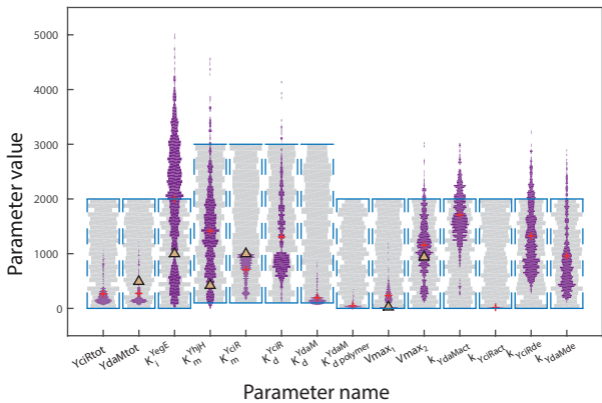

Fig. S2

Supplement: 12918_2015_183_MOESM4_ESM.pdf [file 12918_2015_183_MOESM4_ESM.pdf]
